# Supplementary material for: MPN patients harbor recurrent truncating mutations in transcription factor NF-E2
Source: PubMed Central journal article supplement — J Exp Med. 2013 May 6;210(5):1003–19. doi: 10.1084/jem.20120521 (PMC3646501; doi:10.1084/jem.20120521), 2013-05-06
Supplement: supp_jem.20120521_JEM_20120521_sm.pdf [file supp_jem.20120521_JEM_20120521_sm.pdf]

## SUPPLEMENTAL MATERIAL

Jutzi et al., <http://www.jem.org/cgi/content/full/jem.20120521/DC1>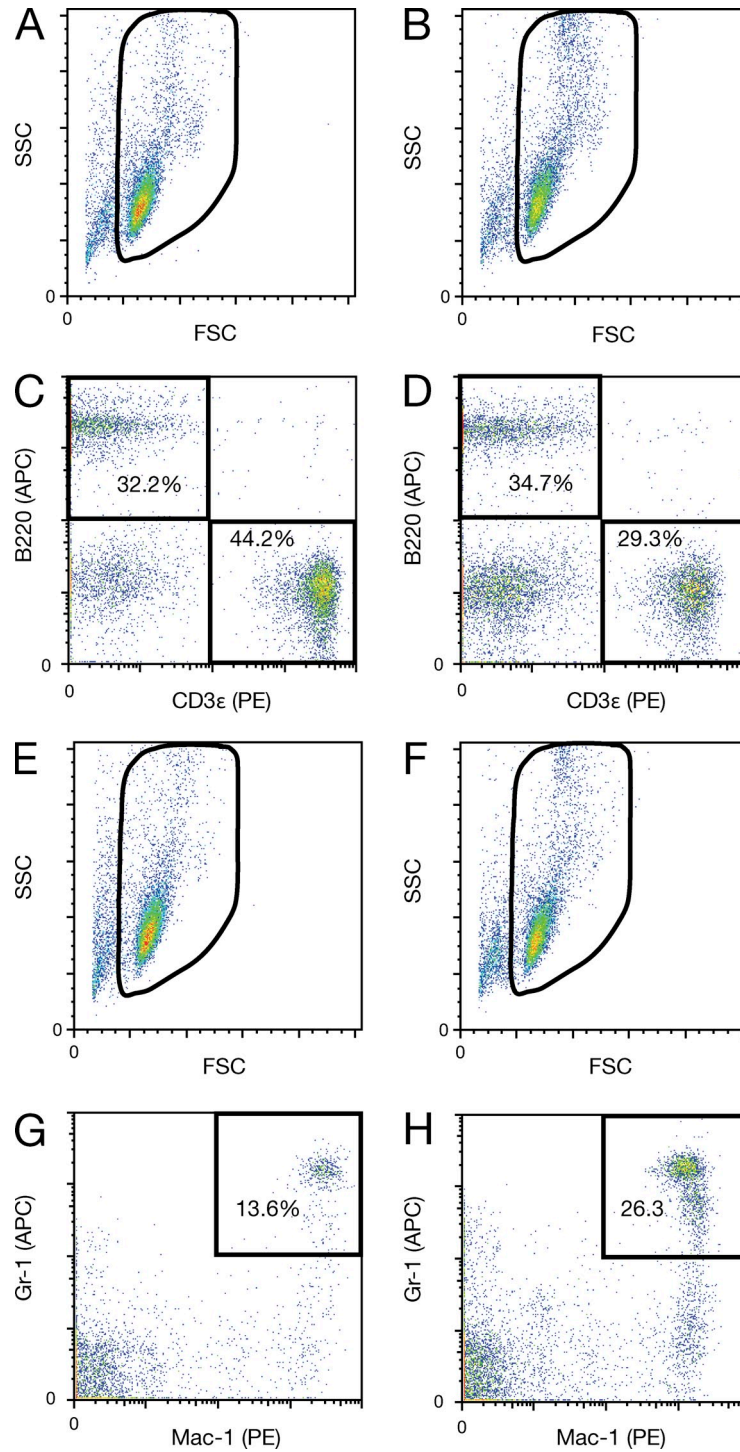

**Figure S1. Quantification of peripheral blood leukocytes (granulocytes and B and T cells) in PB of transplanted mice.** (A–H) Gating strategies. (A, C, E, and G) Representative mouse expressing WT NF-E2. (B, D, F, and H) Representative mouse expressing the NF-E2-262aa truncation. (A and B) Forward scatter (FSC) and sideward scatter (SSC) plots. Live cells are gated. (C and D) B and T cells defined by B220 and CD3 $\epsilon$  positivity, respectively. (E and F) Forward scatter (FSC) and sideward scatter (SSC) plots. Live cells are gated. (G and H) Granulocytic cells defined by Gr-1 and Mac-1 double positivity.

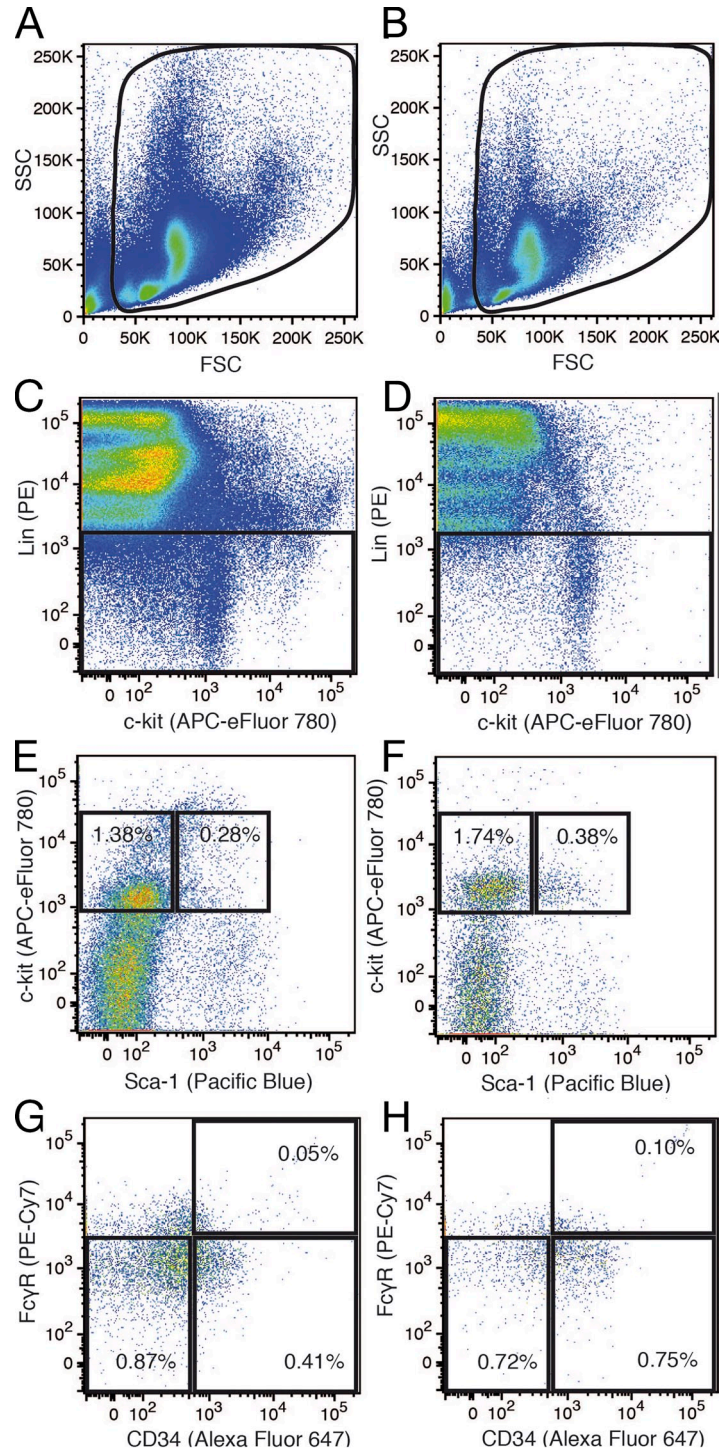

**Figure S2. Quantification of hematopoietic stem and precursor cells (KL, KSL, CMP, GMP, and MEP) in BM of transplanted mice.** (A–H) Gating strategies. Positively staining cells as well as negative cells were determined by fluorescence-minus-one (FMO) stainings, as previously published (Kaufmann et al., 2012). (A, C, E, and G) Representative mouse expressing WT NF-E2. (B, D, F, and H) Representative mouse expressing the NF-E2-262aa truncation. (A and B) Forward scatter (FSC) and sideward scatter (SSC) plots. Live cells are gated. (C and D) Lineage-negative cells. (E and F) Kit-positive lineage-negative (KL) cells and kit-positive sca-positive lineage-negative (KSL) cells are shown. (G and H) CMP, GMP, and MEP cells are defined by Passequé et al. (2005).

**Table S1.** Clinical characteristics of the MPN MDS, sAML, and CMML patients studied

| Diagnosis       | Number of patients | Gender m/f | Mean age at diagnosis (range) | Mean duration of disease (range) | Hemoglobin (at sample)     | WBC (at sample)             | Platelets (at sample)    |
|-----------------|--------------------|------------|-------------------------------|----------------------------------|----------------------------|-----------------------------|--------------------------|
|                 |                    |            | <i>yr</i>                     | <i>yr</i>                        |                            |                             |                          |
| ET              | 120                | 55/65      | 49.7 (17.3–82.3)              | 4.9 (0.0–21.5)                   | 14.1 (8.6–33.9)            | 8.1 (2.5–31.4)              | 671 (149–2,393)          |
| PV              | 144                | 71/73      | 55.5 (16.7–78.4)              | 5.3 (0.0–29.3)                   | 14.6 (7.9–20.3)            | 15.2 (1.8–209.0)            | 513 (40–2,055)           |
| PMF             | 192                | 102/90     | 56.9 (21.3–86.4)              | 3.5 (0.0–20.5)                   | 10.7 (1.2–17.2)            | 15.1 (0.8–102.1)            | 292 (99–593)             |
| MPN-U           | 49                 | 23/26      | 71.0 (34.3–87)                | n.d.                             | 11.0 (5.8–20.0)            | 43.8 (5.8–185)              | 271 (12–1,027)           |
| MDS             | 57                 | 23/34      | 57 (23.7–82.7) <sup>a</sup>   | 3.0 (0.2–13.9) <sup>b</sup>      | 5.5 (2.1–8.1) <sup>c</sup> | 4.7 (0.8–37.2) <sup>d</sup> | 117 (9–517) <sup>e</sup> |
| sAML (post MPN) | 39                 | 21/18      | 57.0 (42.2–76.0)              | 7.0 (0.0–20.9)                   | 9.7 (6.9–15.5)             | 39.2 (1.5–182.4)            | 83 (11–362)              |
| CMML            | 67                 | 41/26      | 71.2 (23.9–85.5)              | n.d.                             | 11.2 (6.6–16.5)            | 22.9 (2.6–91.4)             | 131 (14–711)             |

All patients were diagnosed according to the WHO criteria (Swerdlow et al., 2008). Complete blood count was taken at the time the blood sample was obtained. Abbreviations used and data displayed: MPN-U, MPN-unclassified; MDS, myelodysplastic syndrome; sAML, secondary AML; CMML, chronic myelomonocytic leukemia; WBC, WBC count.

<sup>a</sup>Data missing in 3 cases.

<sup>b</sup>Data missing in 18 cases.

<sup>c</sup>Data missing in 2 cases.

<sup>d</sup>Data missing in 2 cases.

<sup>e</sup>Data missing in 3 cases.

**Table S2.** Clinical features of MPN patients carrying NF-E2 mutations

| UPN   | Diagnosis  | Age at diagnosis | Duration of disease at sample | Hemoglobin at sample | WBC at sample               | Platelet count at sample    | Status                |
|-------|------------|------------------|-------------------------------|----------------------|-----------------------------|-----------------------------|-----------------------|
|       |            |                  | <i>yr</i>                     | <i>g/dl</i>          | <i>10<sup>9</sup>/liter</i> | <i>10<sup>9</sup>/liter</i> |                       |
| 202   | PV         | 47.0             | 15.2                          | 12.8                 | 13.4                        | 421                         | Alive                 |
| 209   | PV         | 49.1             | 10.1                          | 13.4                 | 18.9                        | 412                         | Deceased <sup>a</sup> |
| 241   | Post PV-MF | 44.2             | 20                            | 9.4                  | 6.4                         | 156                         | Alive                 |
| 409   | PV         | 69.6             | 11.6                          | 12.6                 | 5.0                         | 458                         | Alive                 |
| 442   | Post PV-MF | 53.7             | 0                             | 9.3                  | 6.8                         | 240                         | Alive                 |
| 532   | PMF        | 59.9             | 9.2                           | 12.0                 | 9.9                         | 99.0                        | Alive                 |
| 980   | Post ET-MF | 73.2             | 9.0                           | 11.3                 | 3.8                         | 593                         | Alive                 |
| 2,836 | Post ET-MF | 81.7             | 0                             | 13.3                 | 7.2                         | 702                         | Deceased <sup>b</sup> |

<sup>a</sup>Cause of death: sepsis following ERCP (endoscopic retrograde cholangiopancreatography).

<sup>b</sup>Cause of death unknown.

**Table S3.** *NF-E2* variants detected in MPN patients and healthy controls

| UPN   | Diagnosis       | Variant<br>cDNA NM_006163.1 | Variant protein | Genetics     |
|-------|-----------------|-----------------------------|-----------------|--------------|
| 245   | PMF             | c.1094C>G                   | p.R365P         | n.d.         |
| 311   | PV              | c.631C>T                    | p.P211S         | Constitutive |
| 401   | ET              | c.359T>C                    | p.L120P         | n.d.         |
| 405   | PV              | c.677A>G                    | p.D226G         | n.d.         |
| 445   | Post PV-MF      | c.1094C>G                   | p.R365P         | Constitutive |
| 713   | PV              | c.1093C>T                   | p.R365W         | n.d.         |
| 727   | PMF             | c.1094C>G                   | p.R365P         | Constitutive |
| 806   | PV              | c.913C>T                    | p.R305W         | n.d.         |
| 945   | PMF             | c.1094C>G                   | p.R365P         | Constitutive |
| 1,136 | PV              | c.1094C>G                   | p.R365P         | n.d.         |
| 1,455 | ET              | c.758T>A                    | p.L253Q         | n.d.         |
| 2,618 | PV              | c.1094C>G                   | p.R365P         | n.d.         |
|       | Healthy control | c.1094C>G                   | p.R365P         | n.d.         |
|       | Healthy control | c.C1093T                    | p.R365W         | n.d.         |

n.d., not determined.
